# Supplementary material for: Facile synthesis of carbon nitride quantum dots as a highly selective and sensitive fluorescent sensor for the tetracycline detection
Source: Royal Society of Chemistry journal article supplement (doi:10.1039/d1ra04272f), 2021-01-01
Supplement: d1ra04272f1.pdf [file d1ra04272f1.pdf]

## Supporting Information

### Facile synthesis of carbon nitride quantum dots as a highly selective and sensitive fluorescent sensor for tetracycline detection

Ruining Bai, Heli Sun, Peng Jin, Jingwei Li, Anzhong Peng, Jieli He\*

College of Pharmacy, Dali University, Dali 671000, Yunnan, P. R. China

**Table S1** Detailed values of reproducibility experiments.

| $F_0$ (a.u.) | F (a.u.) | Detection value ( $\mu\text{M}$ ) | Average ( $\mu\text{M}$ ) | Average recovery (%) | RSD (% , n=7) |
|--------------|----------|-----------------------------------|---------------------------|----------------------|---------------|
| 618.802      | 282.066  | 201.42                            |                           |                      |               |
| 630.713      | 286.037  | 202.45                            |                           |                      |               |
| 613.319      | 284.530  | 197.80                            |                           |                      |               |
| 593.324      | 276.509  | 196.86                            | 199.26                    | 99.63                | 1.10          |
| 616.117      | 285.617  | 197.96                            |                           |                      |               |
| 606.573      | 277.586  | 200.61                            |                           |                      |               |
| 621.127      | 288.284  | 197.71                            |                           |                      |               |

( $F_0$  is the fluorescence intensity of g- $\text{C}_3\text{N}_4$ QDs without TC; F is the fluorescence intensity of g- $\text{C}_3\text{N}_4$ QDs with 200  $\mu\text{M}$  TC).

**Table S2** Statistical evaluation.

| Standard values ( $\mu\text{M}$ ) | Measured values ( $\mu\text{M}$ ) | Mean values ( $\mu\text{M}$ ) | S    | RSD (% , n = 6) | Outliers ( $\mu\text{M}$ ) |
|-----------------------------------|-----------------------------------|-------------------------------|------|-----------------|----------------------------|
|                                   | 9.31                              |                               |      |                 |                            |
|                                   | 8.61                              |                               |      |                 |                            |
| 9.01                              | 9.27                              | 8.94                          | 0.29 | 0.03            | 9.31                       |
|                                   | 8.66                              |                               |      |                 |                            |
|                                   | 8.92                              |                               |      |                 |                            |
|                                   | 8.88                              |                               |      |                 |                            |
|                                   | 156.65                            |                               |      |                 |                            |
|                                   | 154.54                            |                               |      |                 |                            |
| 157.66                            | 157.86                            | 156.09                        | 1.71 | 0.01            | 158.22                     |
|                                   | 154.48                            |                               |      |                 |                            |
|                                   | 158.22                            |                               |      |                 |                            |
|                                   | 154.78                            |                               |      |                 |                            |

**Table S3** Detection of TC in tap water and milk powder samples.

| Samples     | Added ( $\mu\text{M}$ ) | Detected ( $\mu\text{M}$ ) | Recovery (%) | RSD (% , $n = 3$ ) |
|-------------|-------------------------|----------------------------|--------------|--------------------|
| Tap water   | 6.75                    | 6.80                       | 100.74       | 2.27               |
|             | 18.02                   | 18.81                      | 101.22       | 2.87               |
|             | 56.31                   | 55.63                      | 97.19        | 3.75               |
|             | 157.66                  | 162.01                     | 102.76       | 0.23               |
| Milk powder | 6.75                    | 6.49                       | 96.16        | 1.17               |
|             | 18.02                   | 18.89                      | 104.85       | 3.00               |
|             | 56.31                   | 57.83                      | 102.69       | 3.14               |
|             | 157.66                  | 153.16                     | 95.08        | 0.41               |

**Table S4** Some parameters of Stern-Volmer plots.

| Temperature (T/K) | Stern-Volmer equation ( $C$ , $\mu\text{M}$ ) | Correlation coefficient ( $R^2$ ) | $K_s$ ( $\text{L} \cdot \text{mol}^{-1}$ ) |
|-------------------|-----------------------------------------------|-----------------------------------|--------------------------------------------|
| 303               | $F_0/F = 1.01555 + 4.56 \times 10^{-3} [Q]$   | 0.99836                           | $4.56 \times 10^3$                         |
| 313               | $F_0/F = 1.00511 + 4.15 \times 10^{-3} [Q]$   | 0.99688                           | $4.15 \times 10^3$                         |
| 333               | $F_0/F = 1.00821 + 3.71 \times 10^{-3} [Q]$   | 0.99687                           | $3.71 \times 10^3$                         |

**Table S5** Some parameters of fluorescent decay curves.

| Sample                                 | $\tau_1$ | $A_1$  | $\tau_2$ | $A_2$  | $\tau_3$ | $A_3$ | $\tau_{\text{ave}}$ |
|----------------------------------------|----------|--------|----------|--------|----------|-------|---------------------|
| g- $\text{C}_3\text{N}_4\text{QDs}$    | 5.04     | 285.18 | 1.48     | 759.53 | 19.08    | 21.79 | 5.66                |
| g- $\text{C}_3\text{N}_4\text{QDs-TC}$ | 1.50     | 706.64 | 5.42     | 347.79 | 22.54    | 11.90 | 5.56                |
